# Supplementary material
Source: Springer Nature journal article supplement (https://www.springerprofessional.de/resource/supplementary/13688_2013_25_MOESM14_ESM.pdf/11893776)

IBC Bagdad

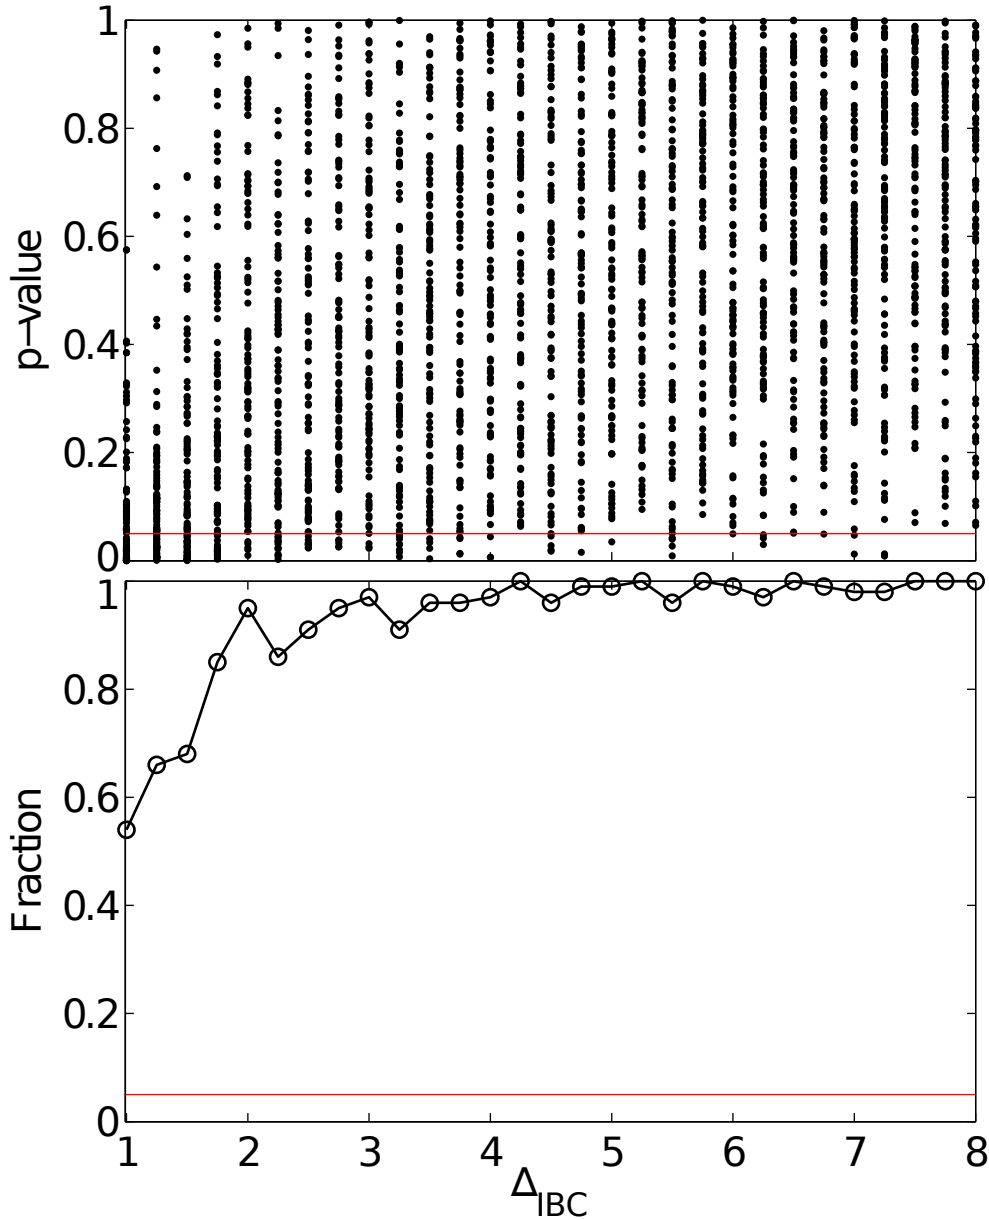

SIGACT Bagdad

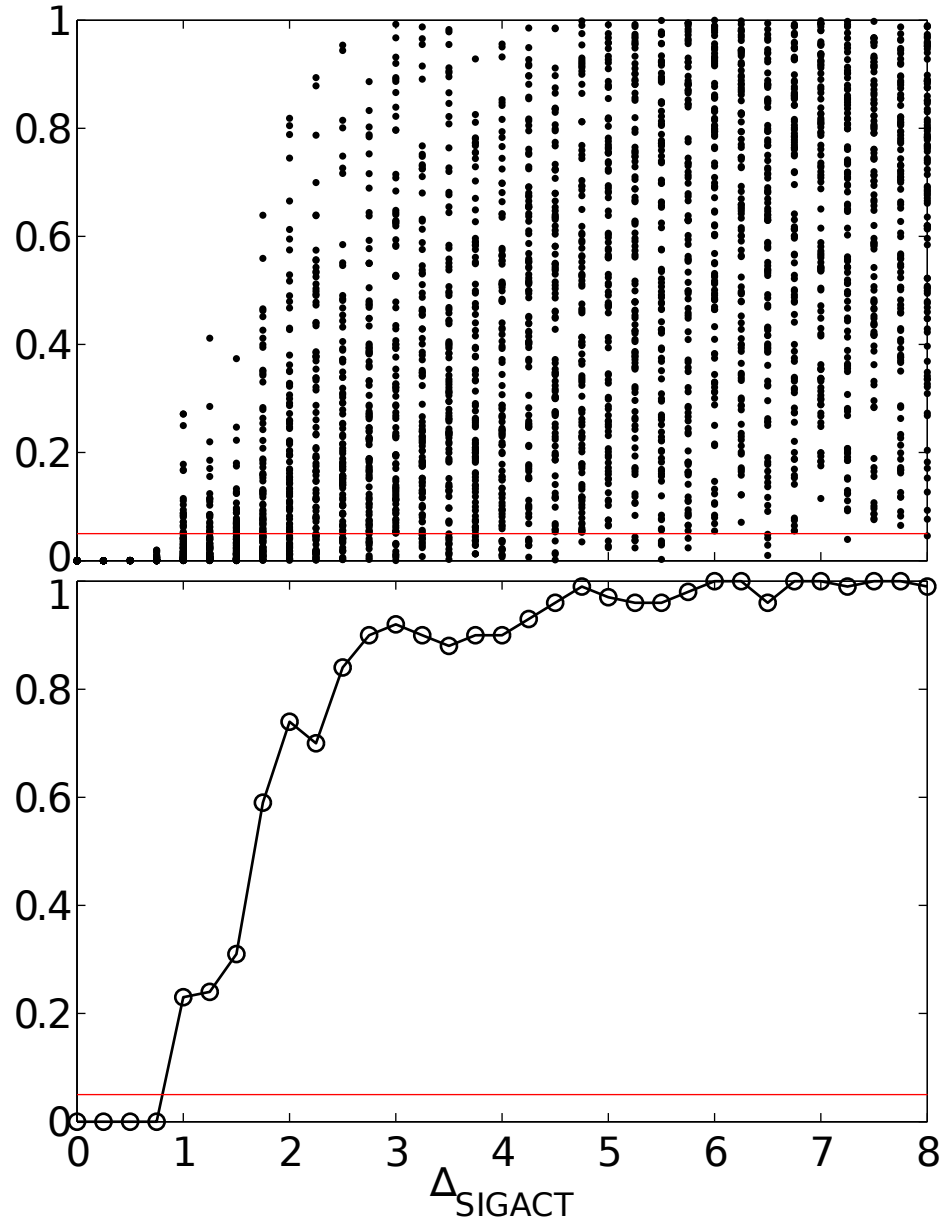

Supplement: MOESM14 [file 11893776]
